# Supplementary figures and images for: Osmotic Gradient Is a Factor That Influences the Gill Microbiota Communities in Oryzias melastigma
Source: MDPI journal article supplement (doi:10.3390/biology11101528), 2022-10-19

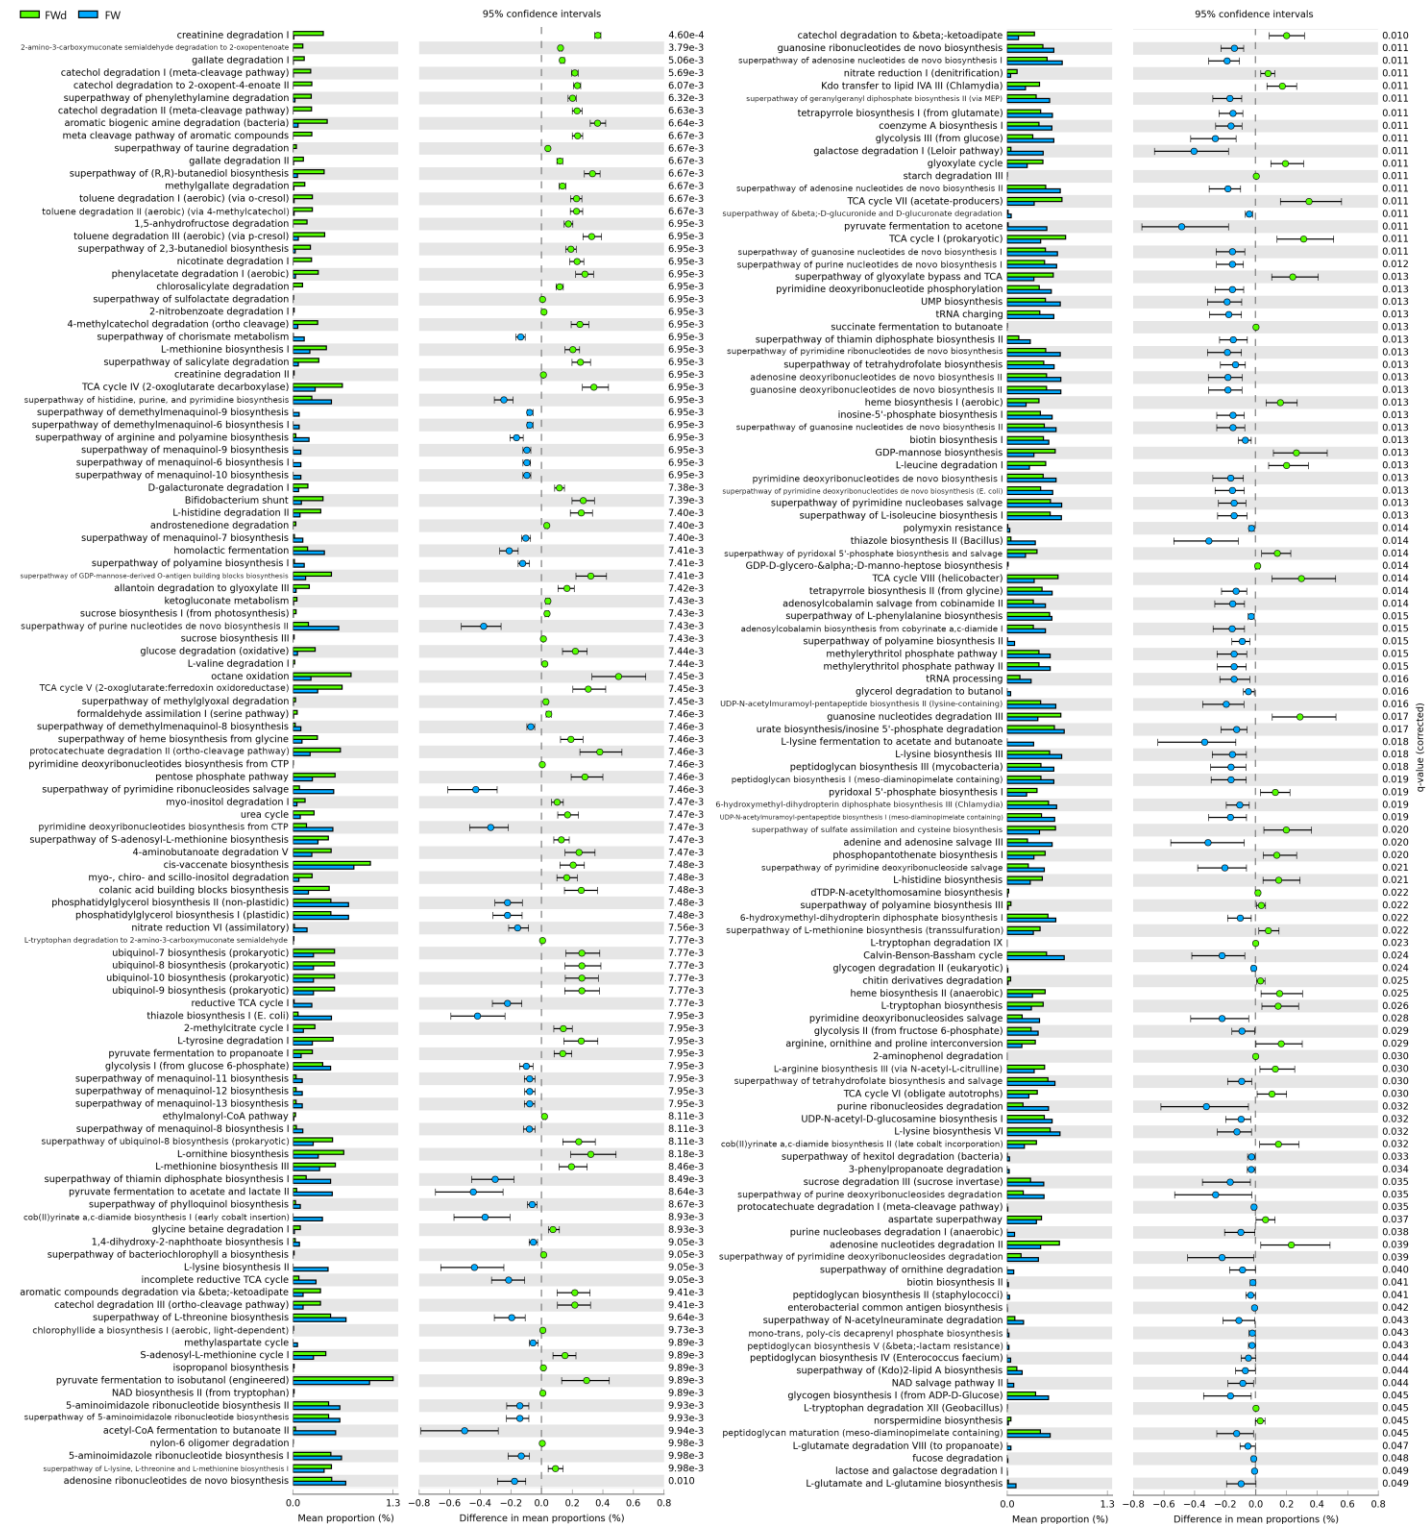

Supplement: s1 [file s1]

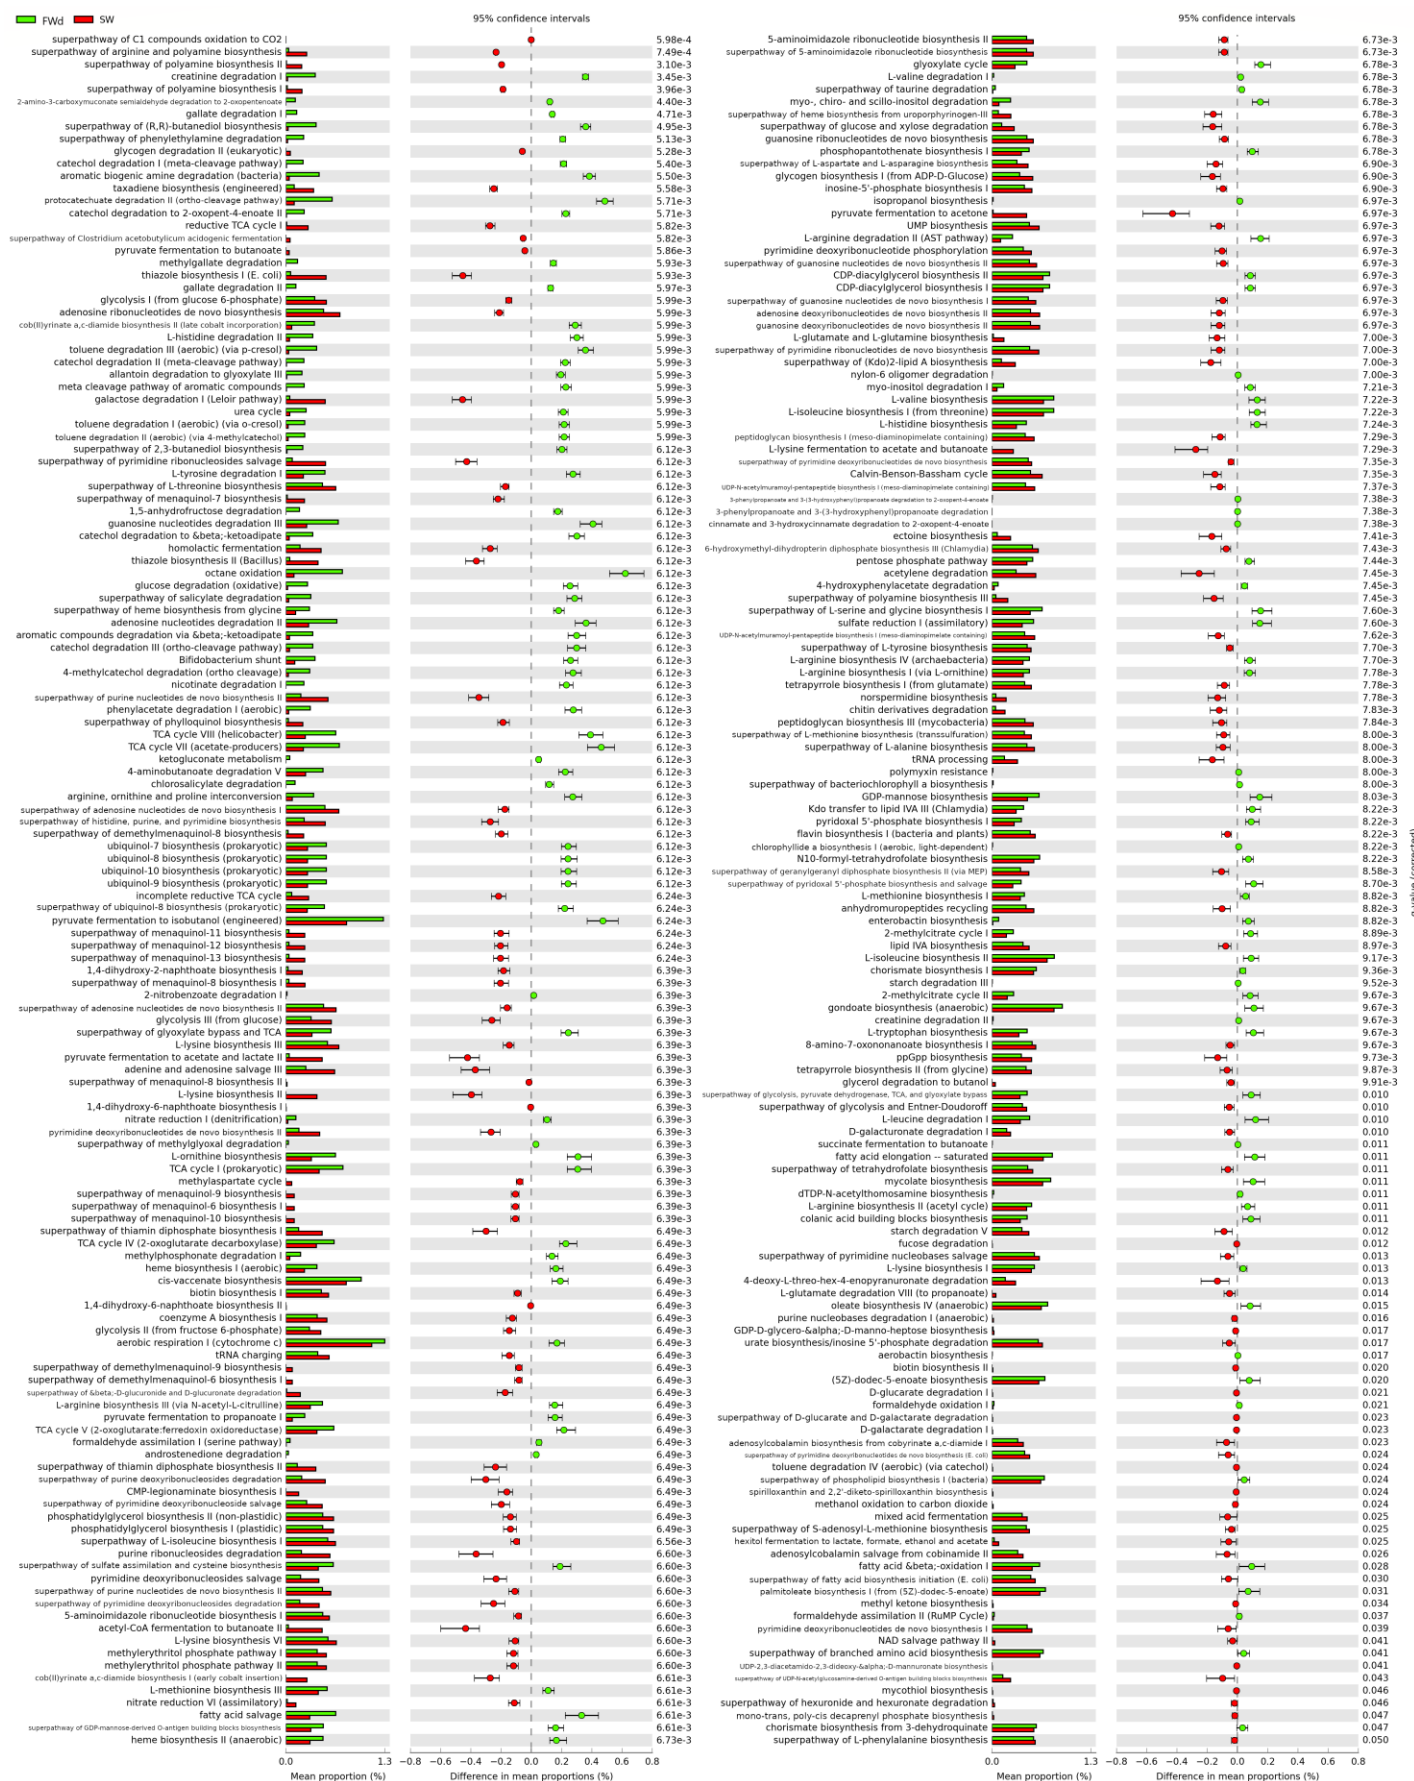

Supplement: s1 [file s1]
